# Supplementary material for: Mutual regulation between phosphofructokinase 1 platelet isoform and VEGF promotes glioblastoma tumor growth
Source: PubMed Central journal article supplement (PMC9701207; doi:10.1038/s41419-022-05449-6), 2022-11-26
Supplement: 41419_2022_5449_MOESM1_ESM.pdf [file 41419_2022_5449_MOESM1_ESM.pdf]

# Supplementary Figure 1

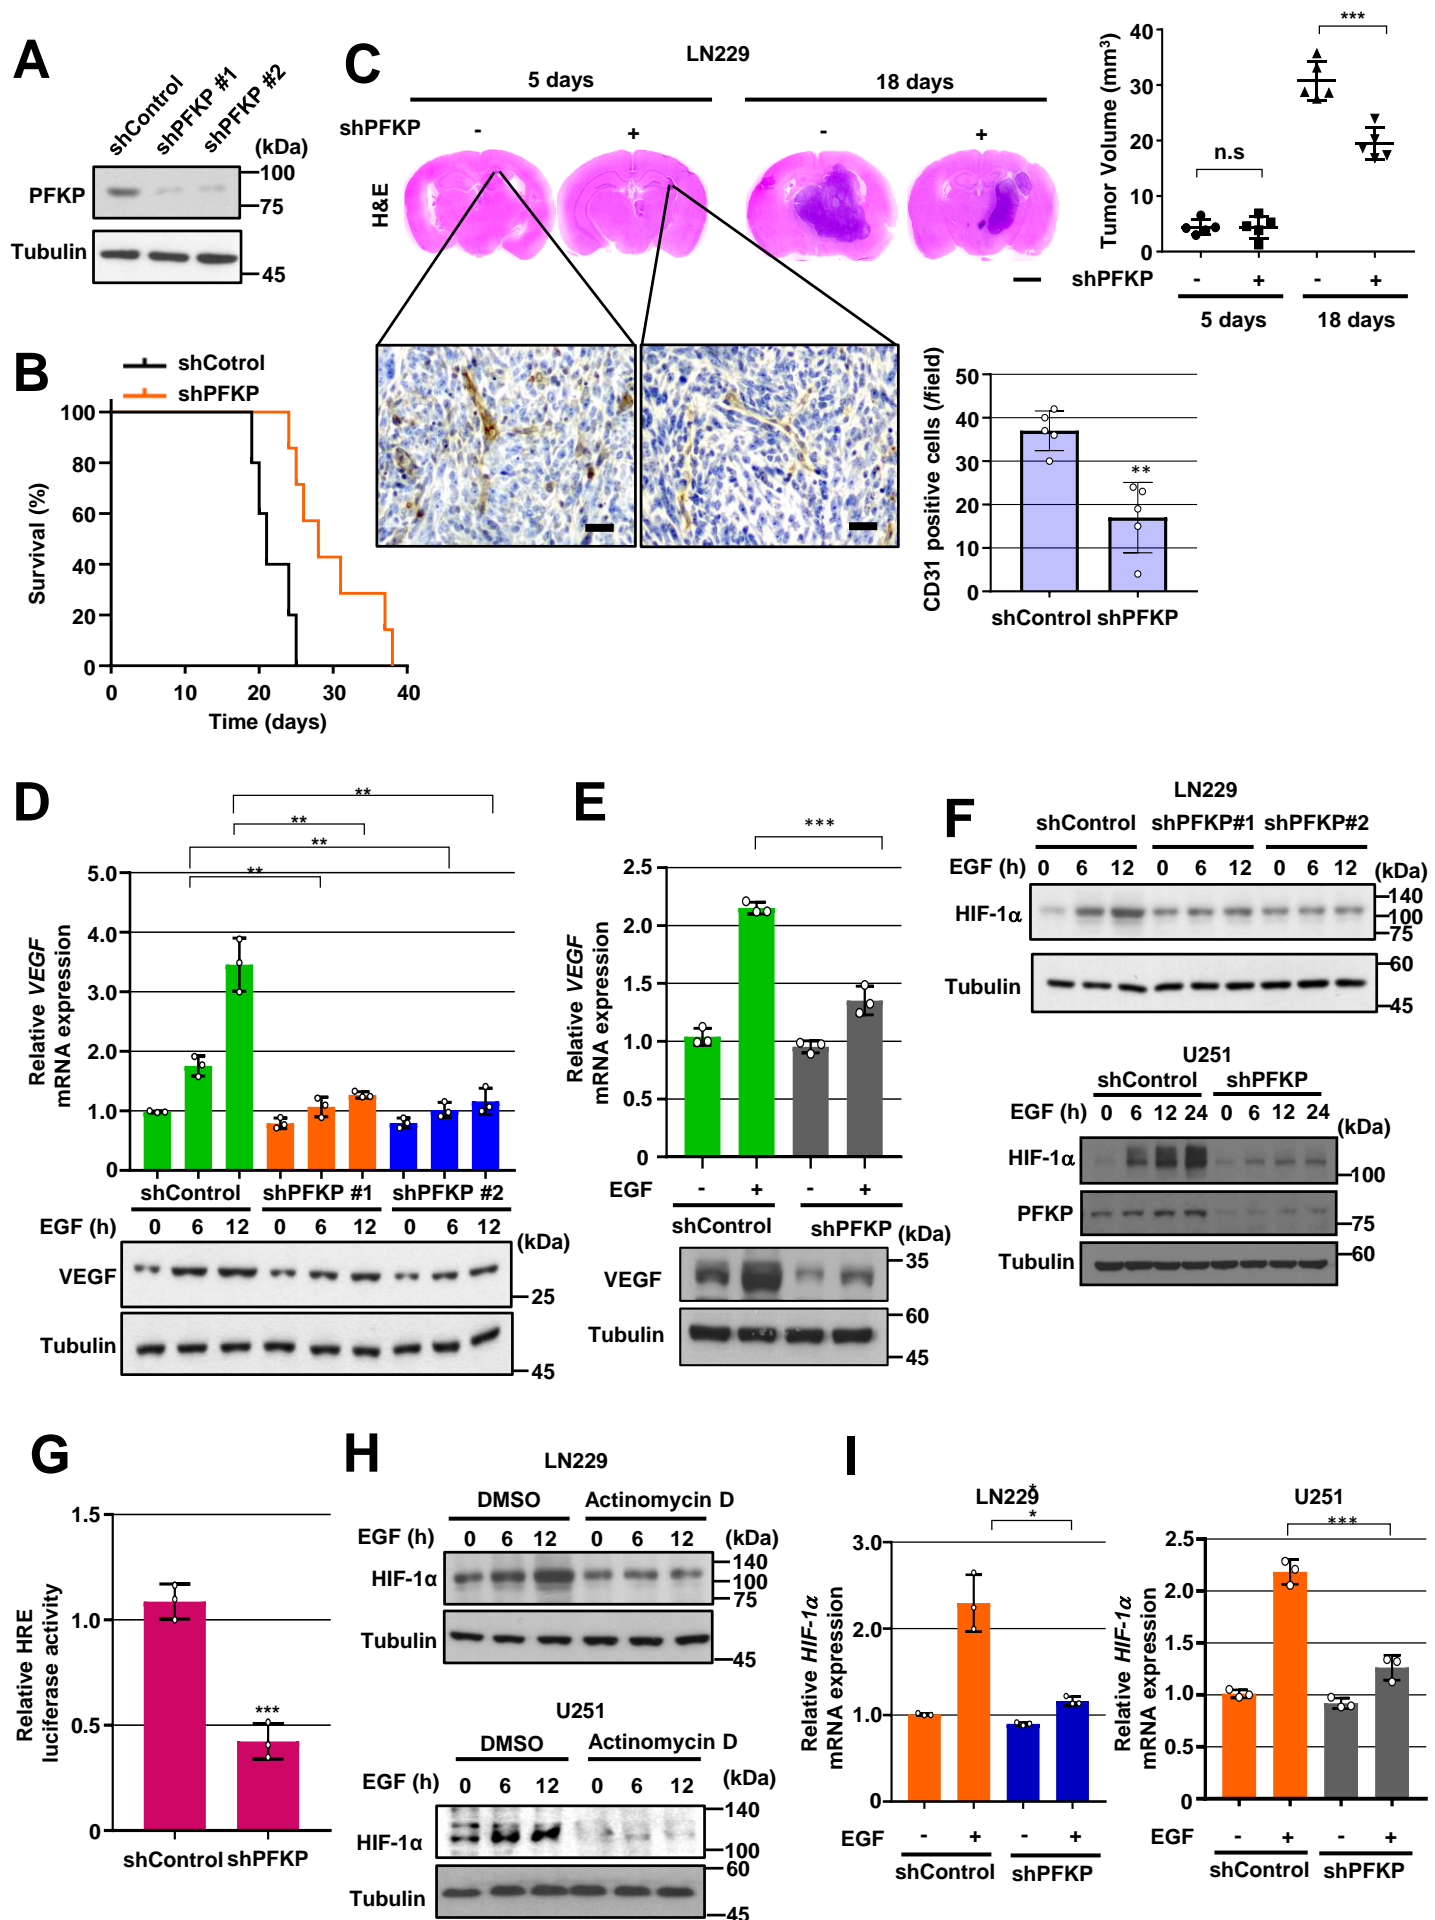

# Supplementary Figure 2

## A

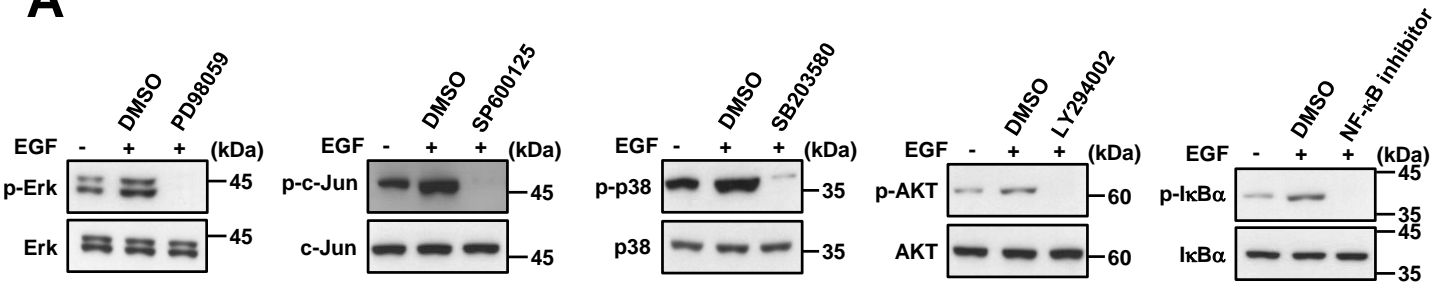

## B

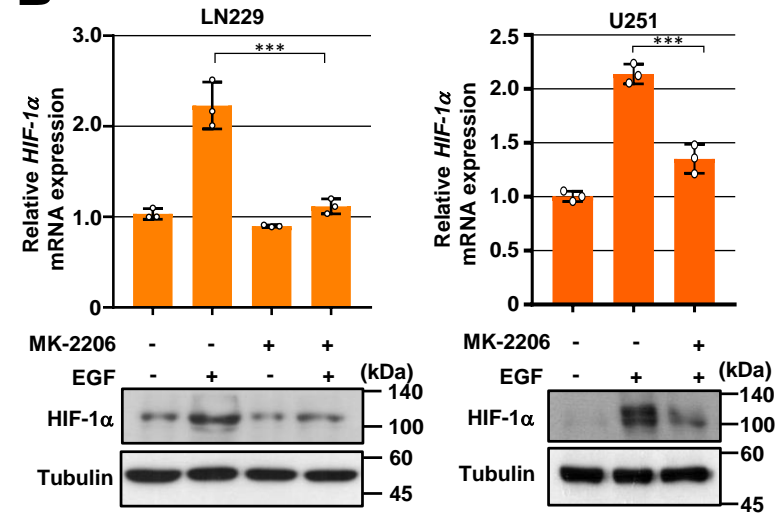

## C

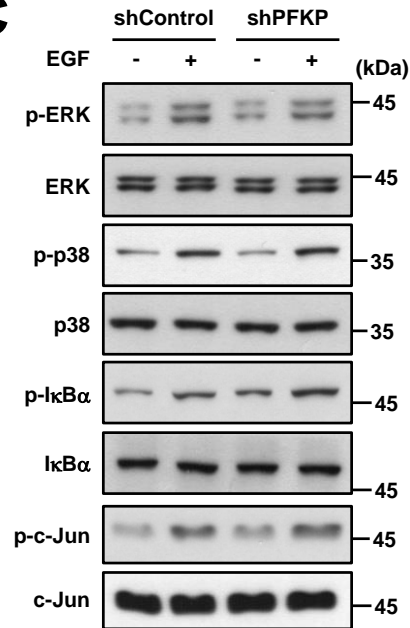

## D

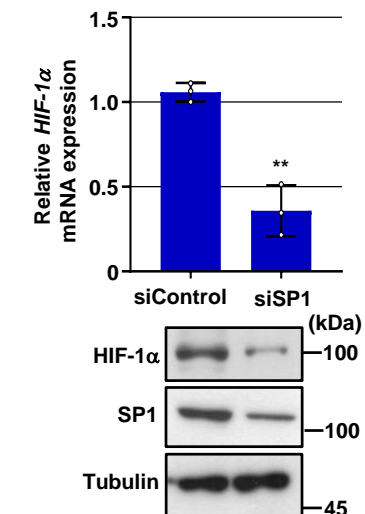

## E

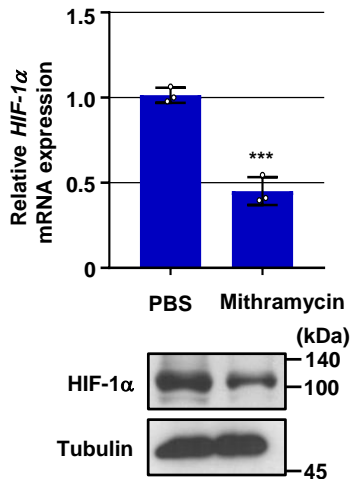

# Supplementary Figure 3

**A**

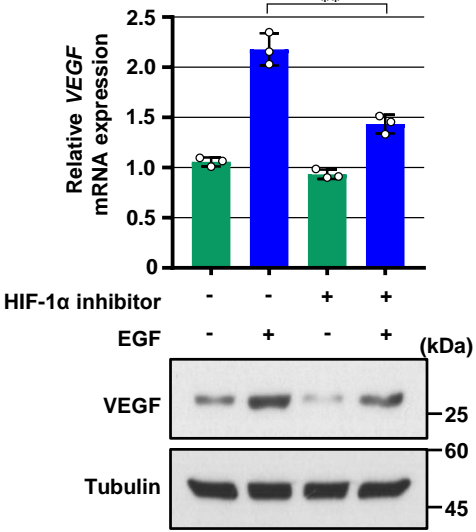

**B**

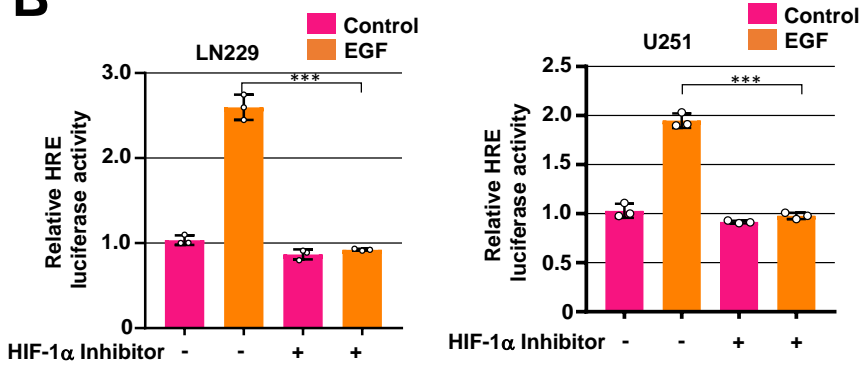

# Supplementary Figure 4

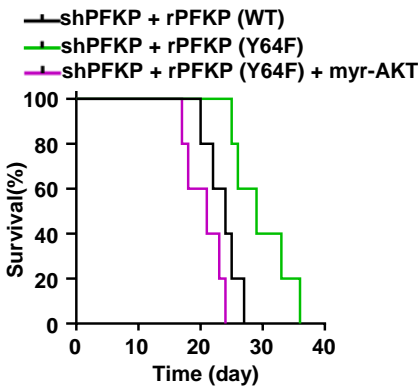

# Supplementary Figure 5

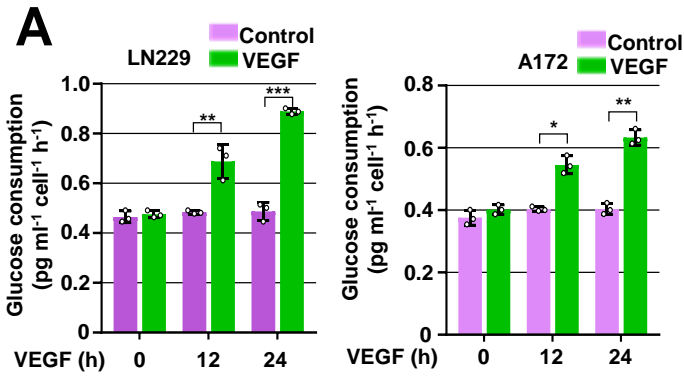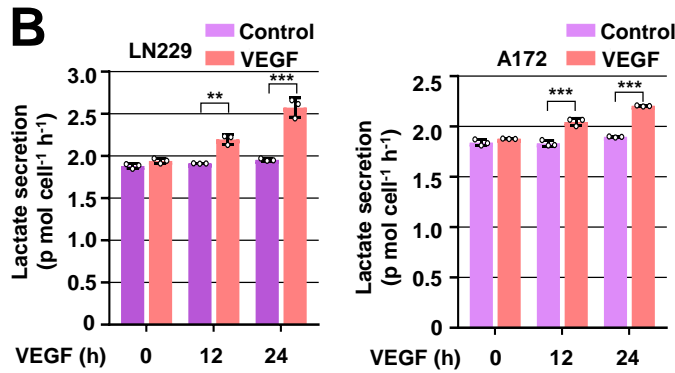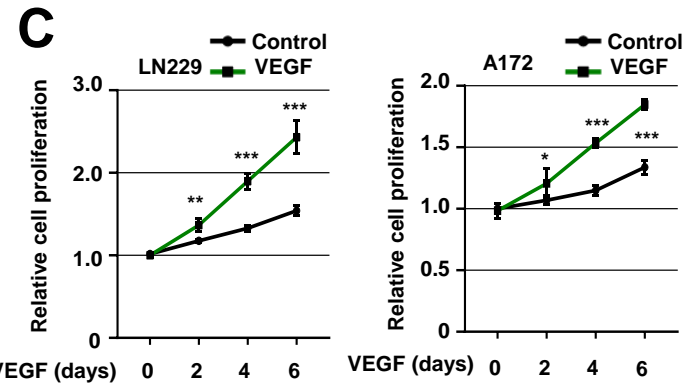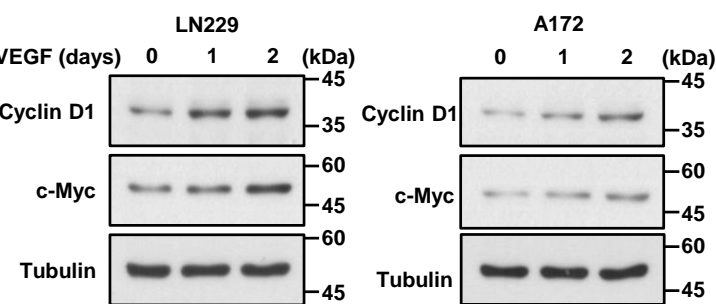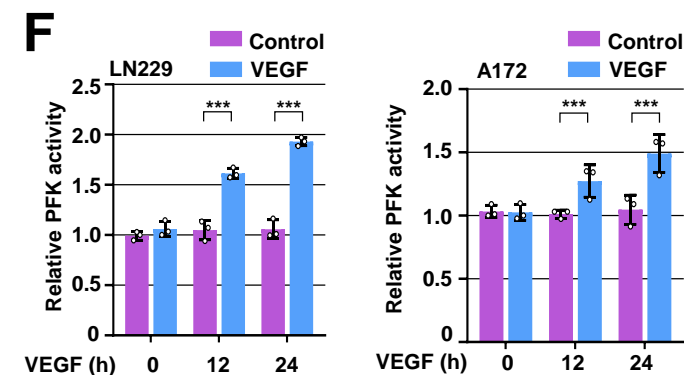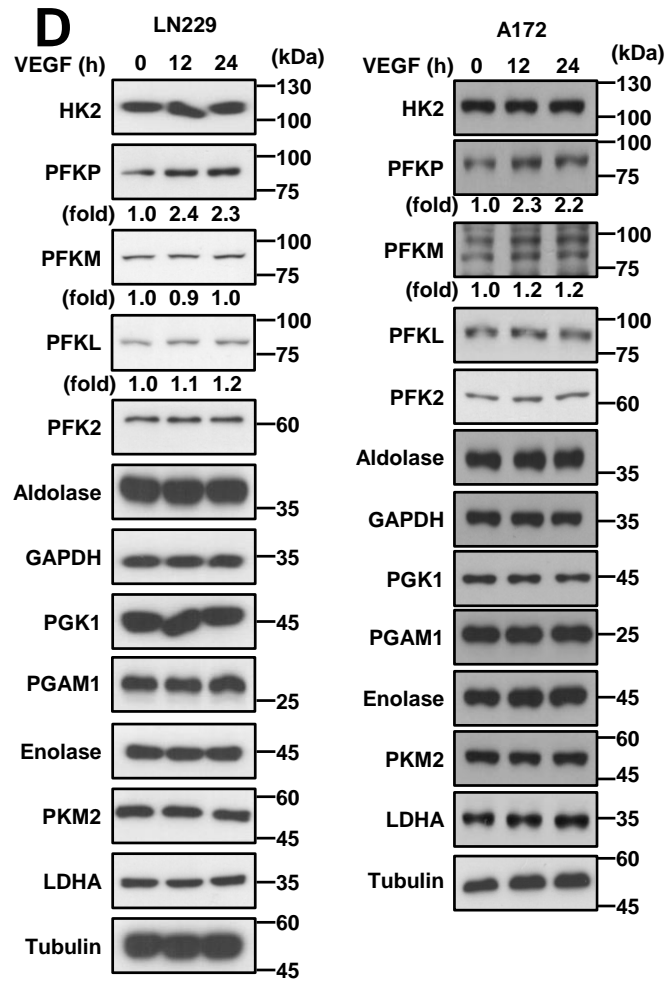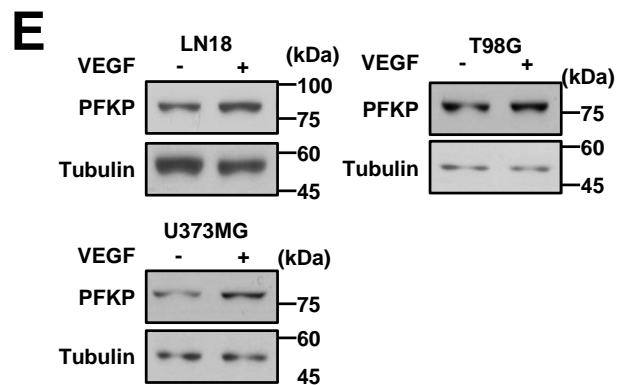

# Supplementary Figure 5

## G

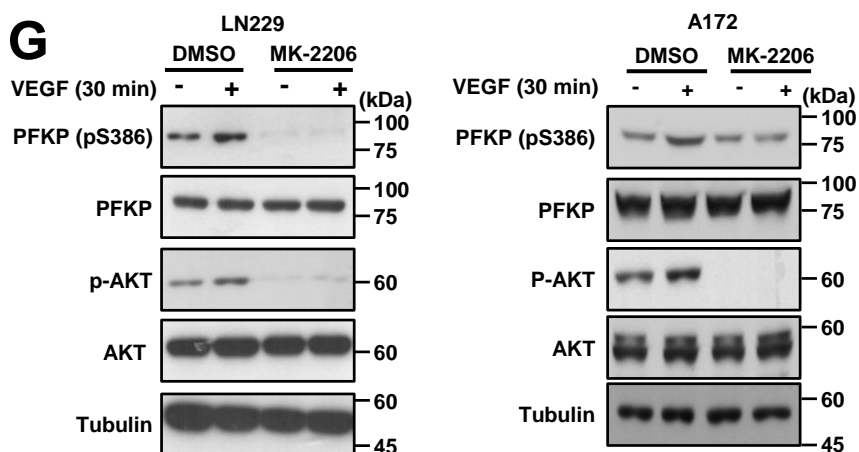

## H

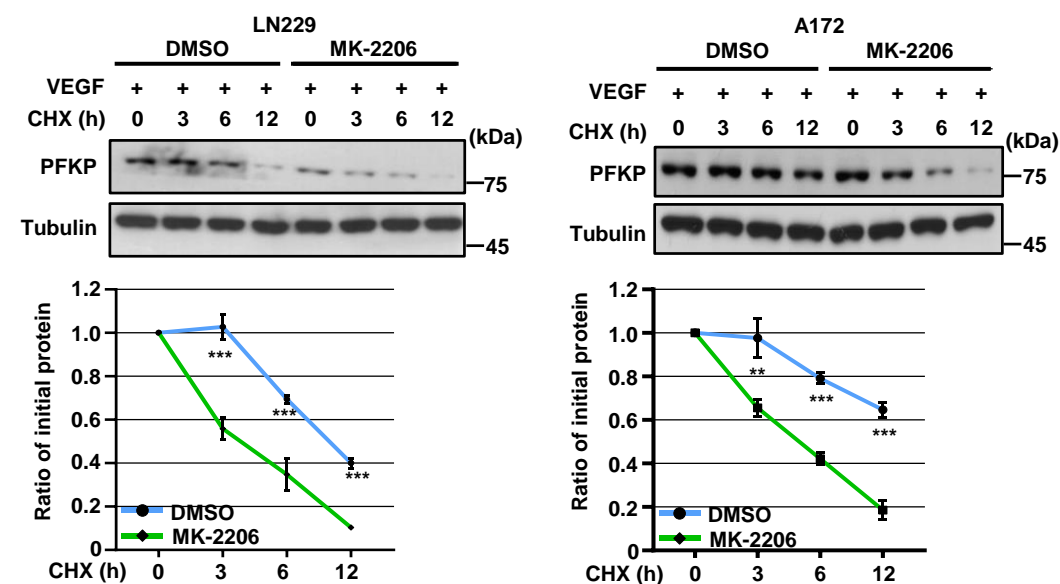

## I

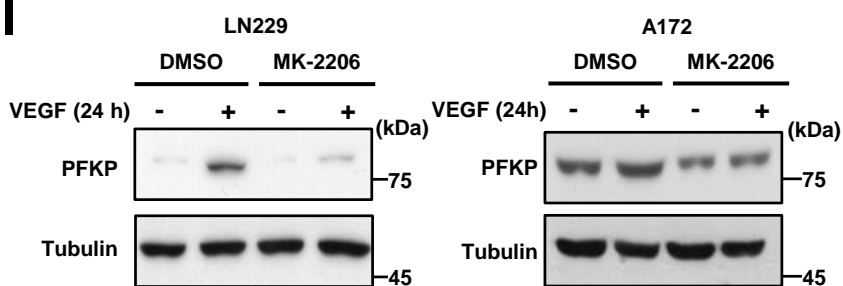

## J

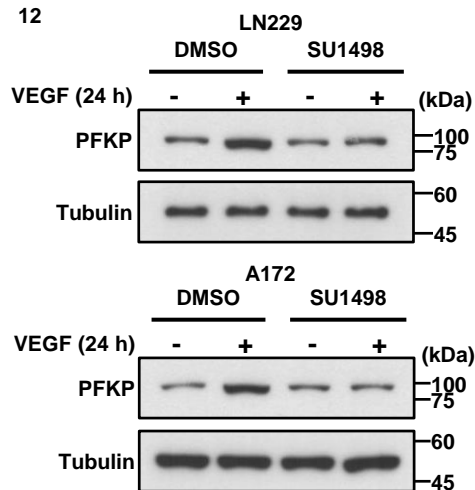

## K

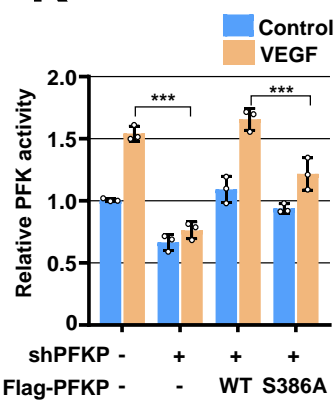

## L

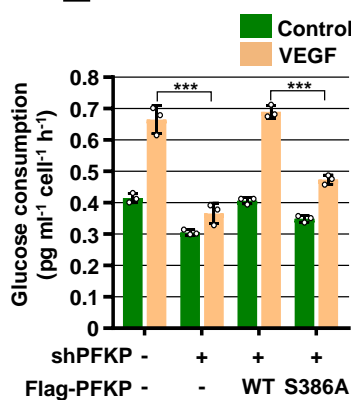

## M

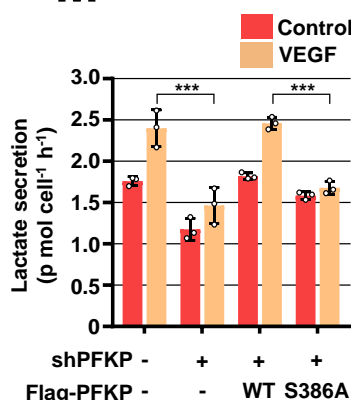

## N

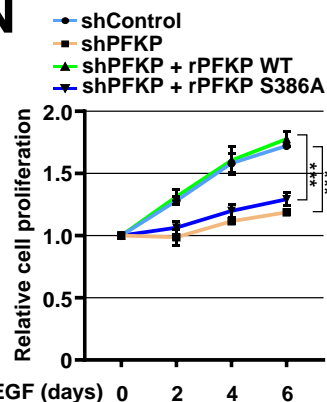

# Supplementary Figure 6

Figure 1

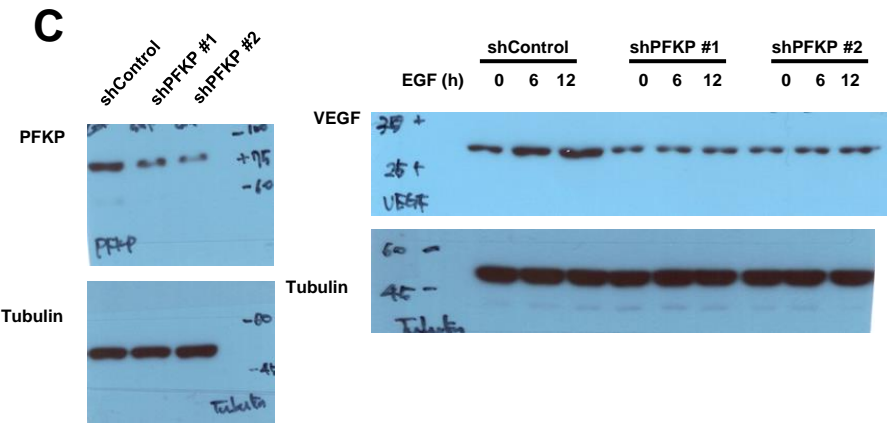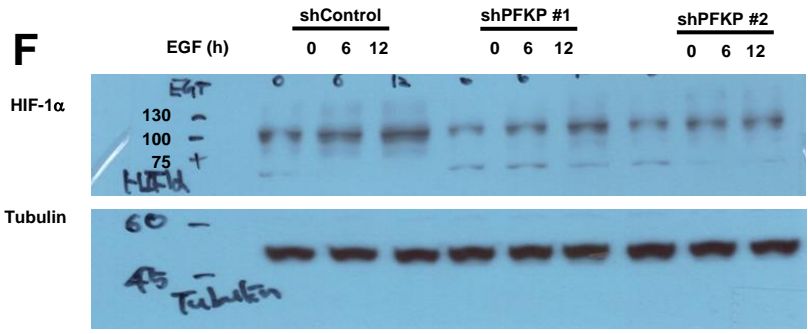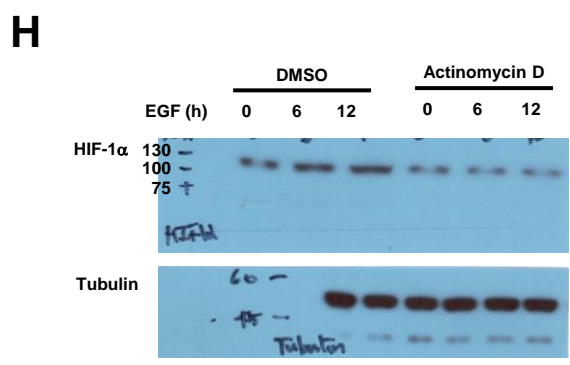

Figure 2

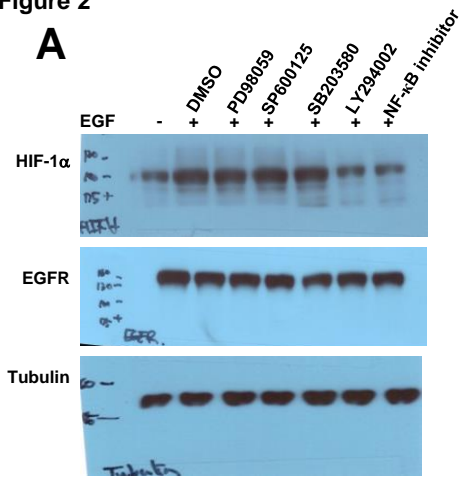

**D**

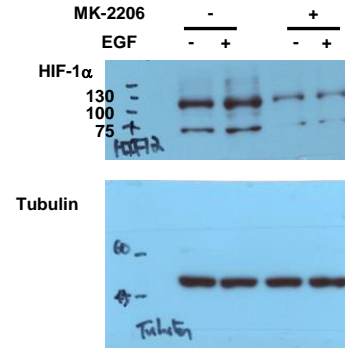

**F**

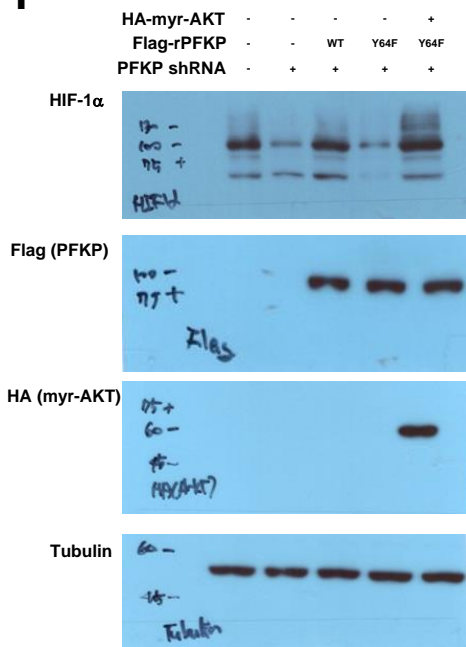

**G**

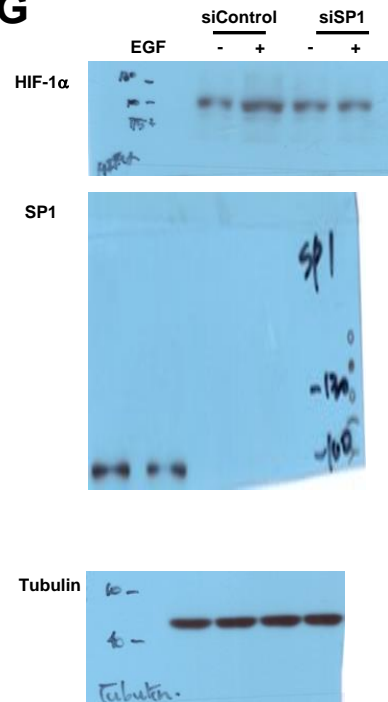

**H**

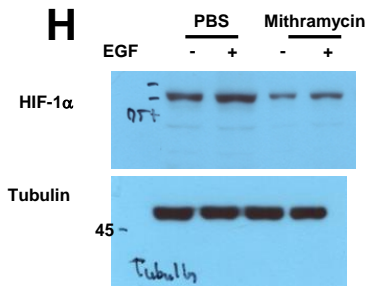



Figure 3

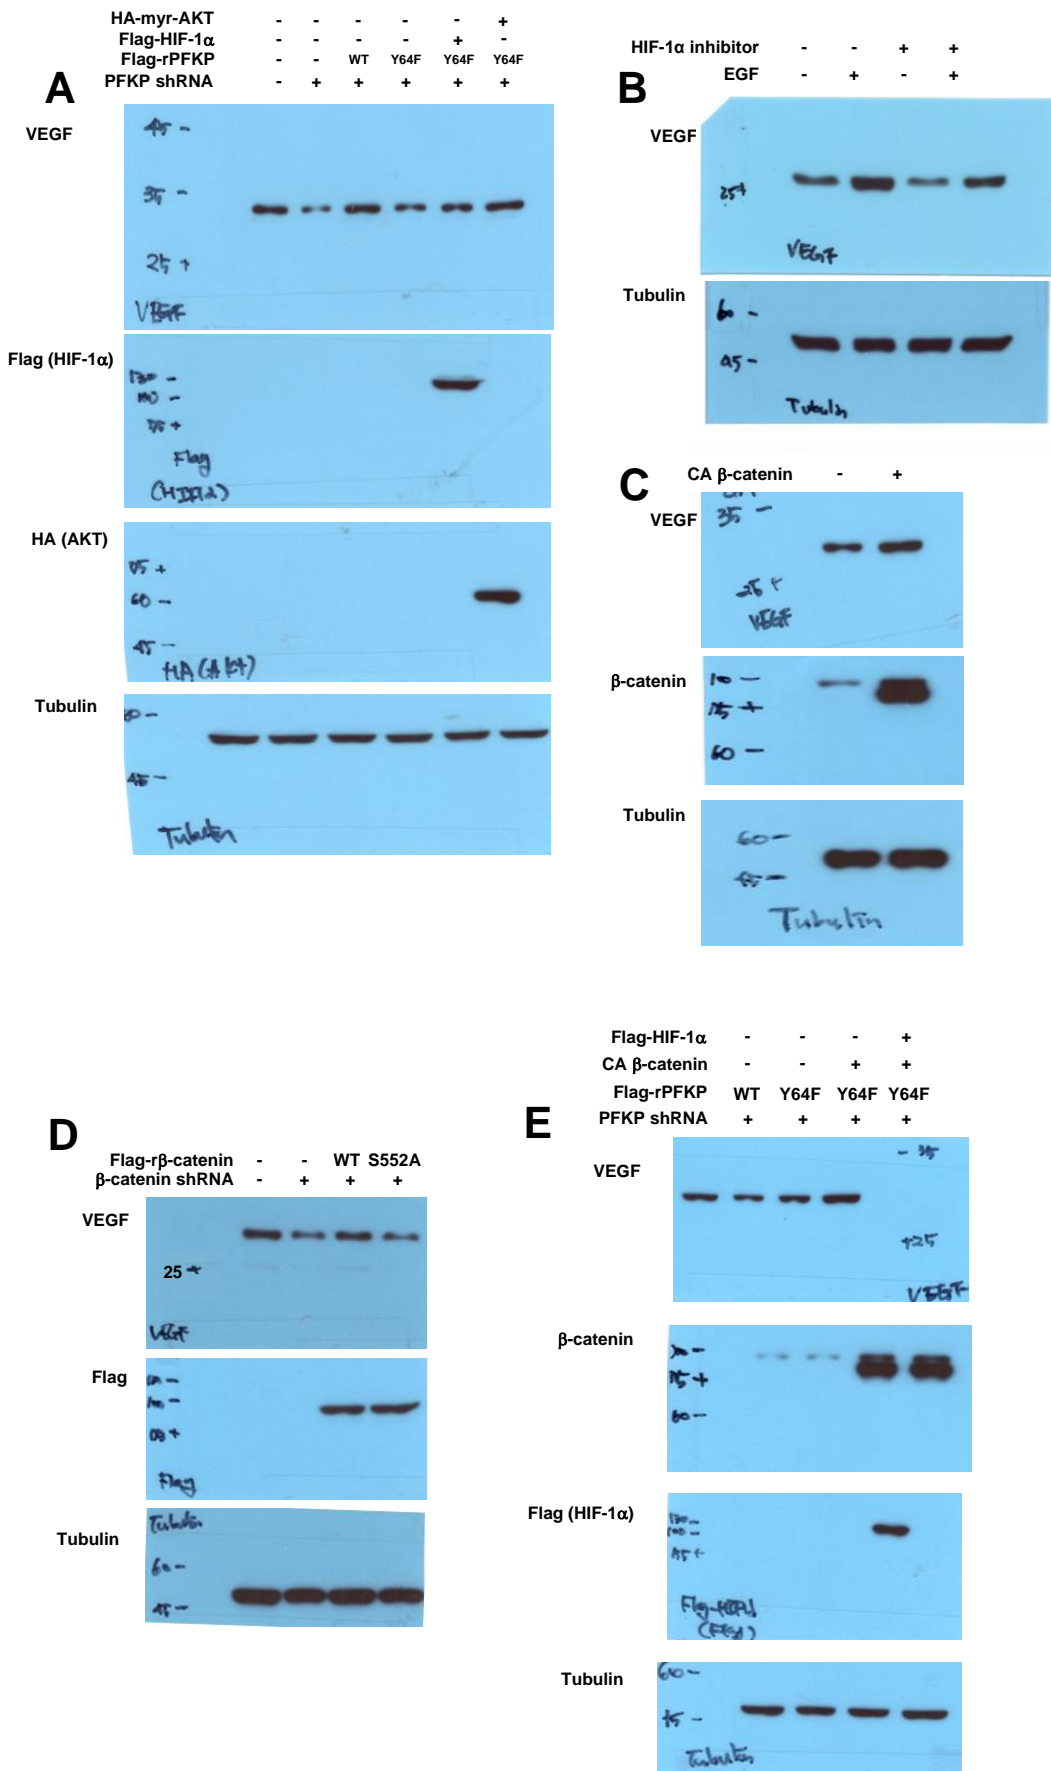

**Figure 5**

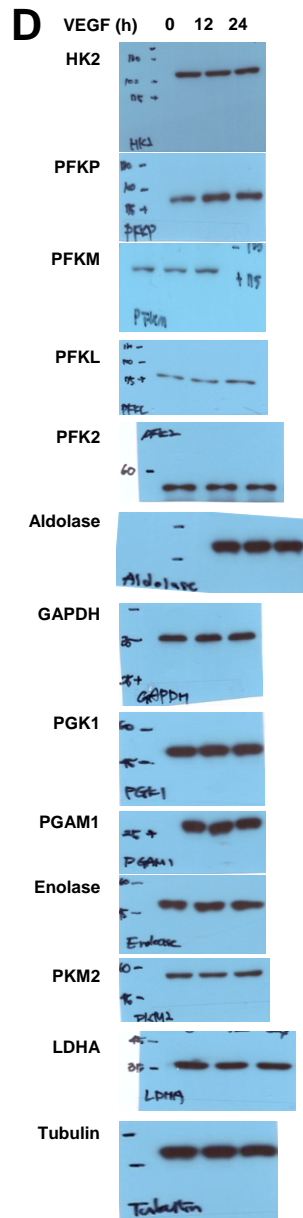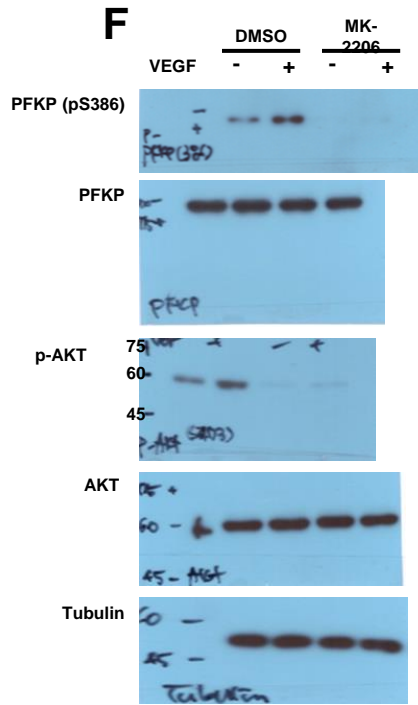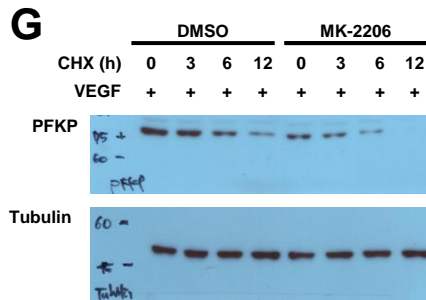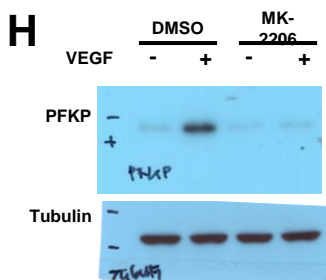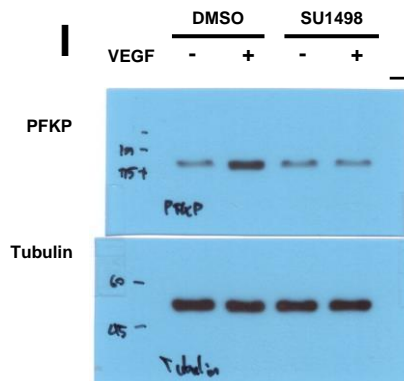

Figure S1

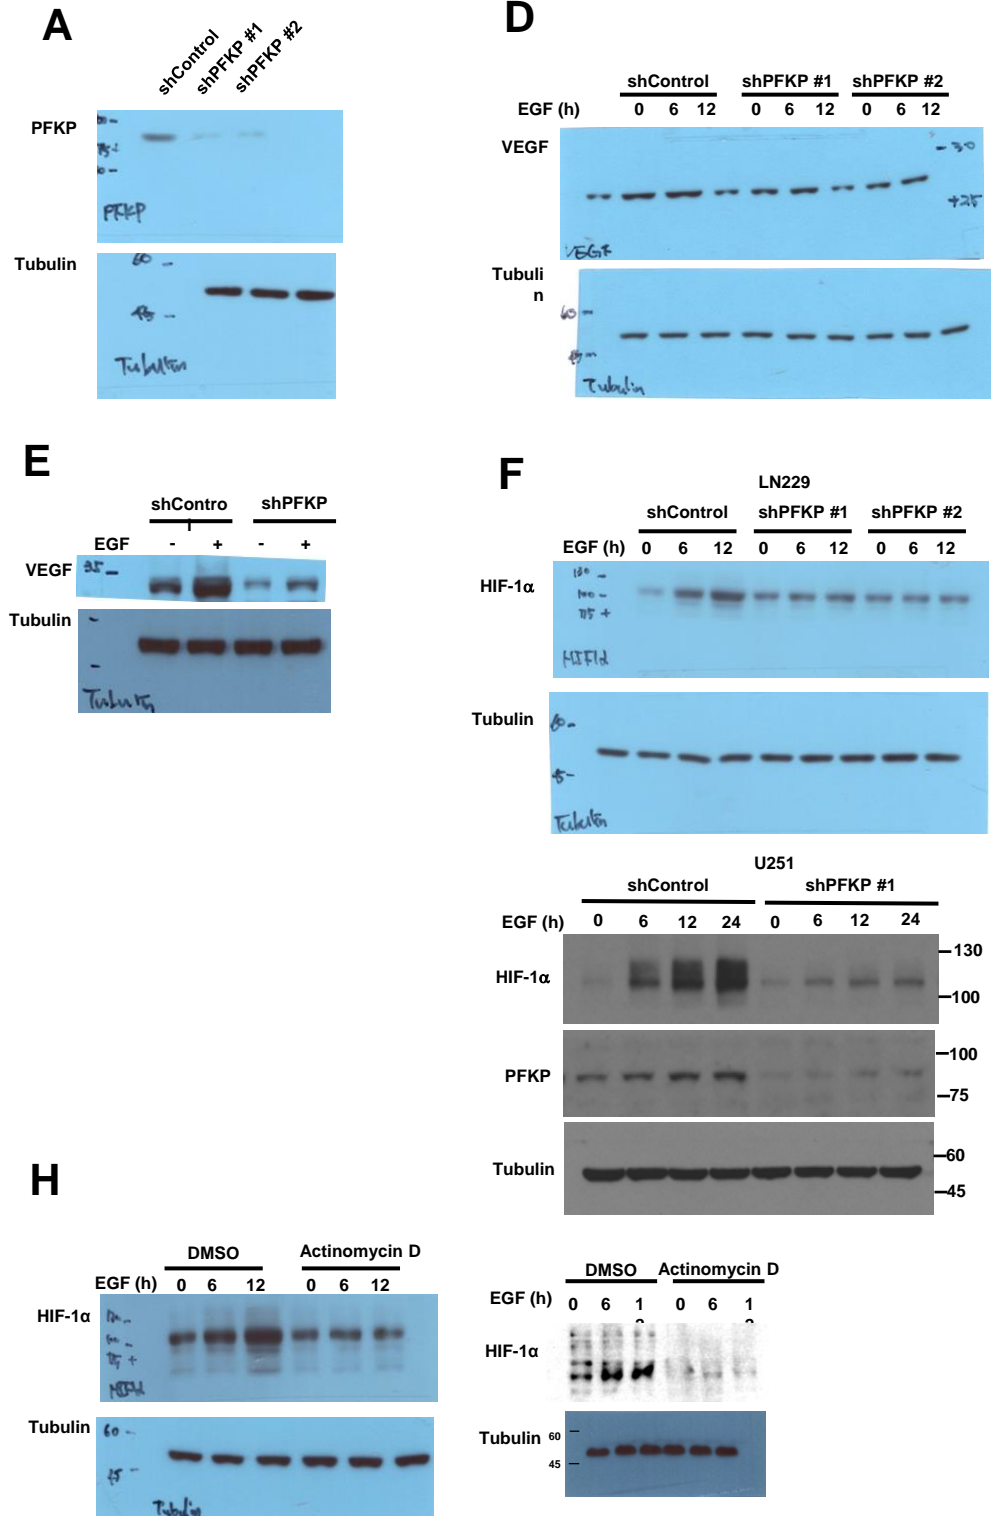

Figure S2

**A**

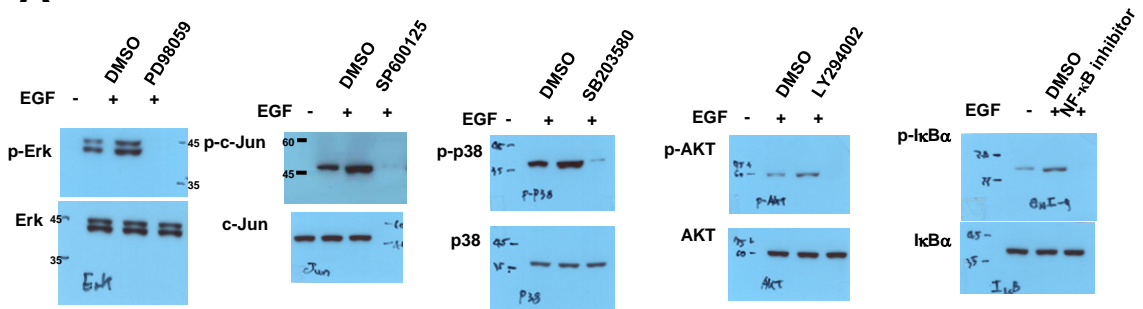

**B**

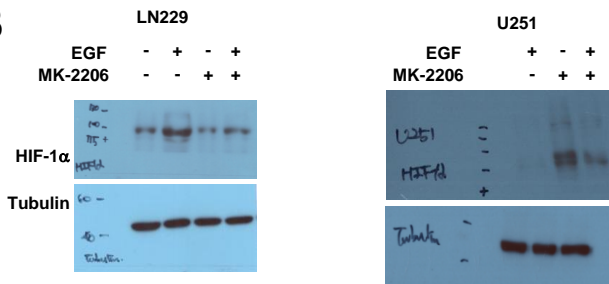

**C**

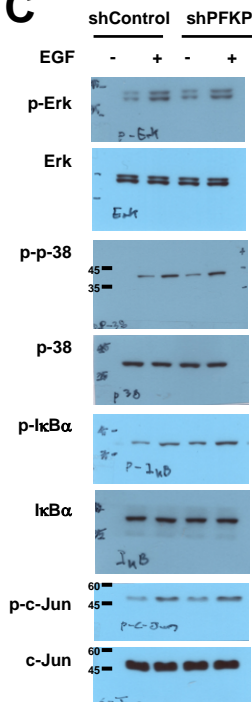

**D**

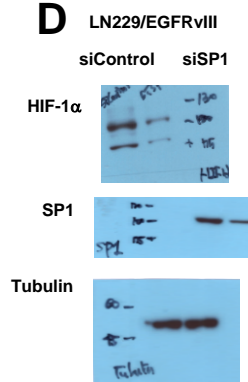

**E**

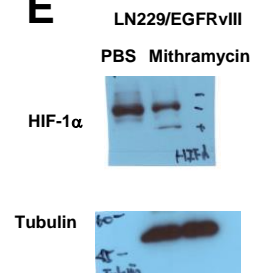

Figure S3

A

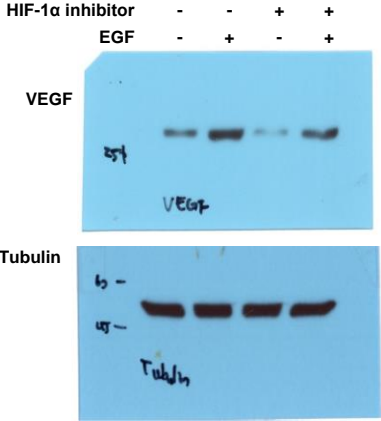

Figure S5

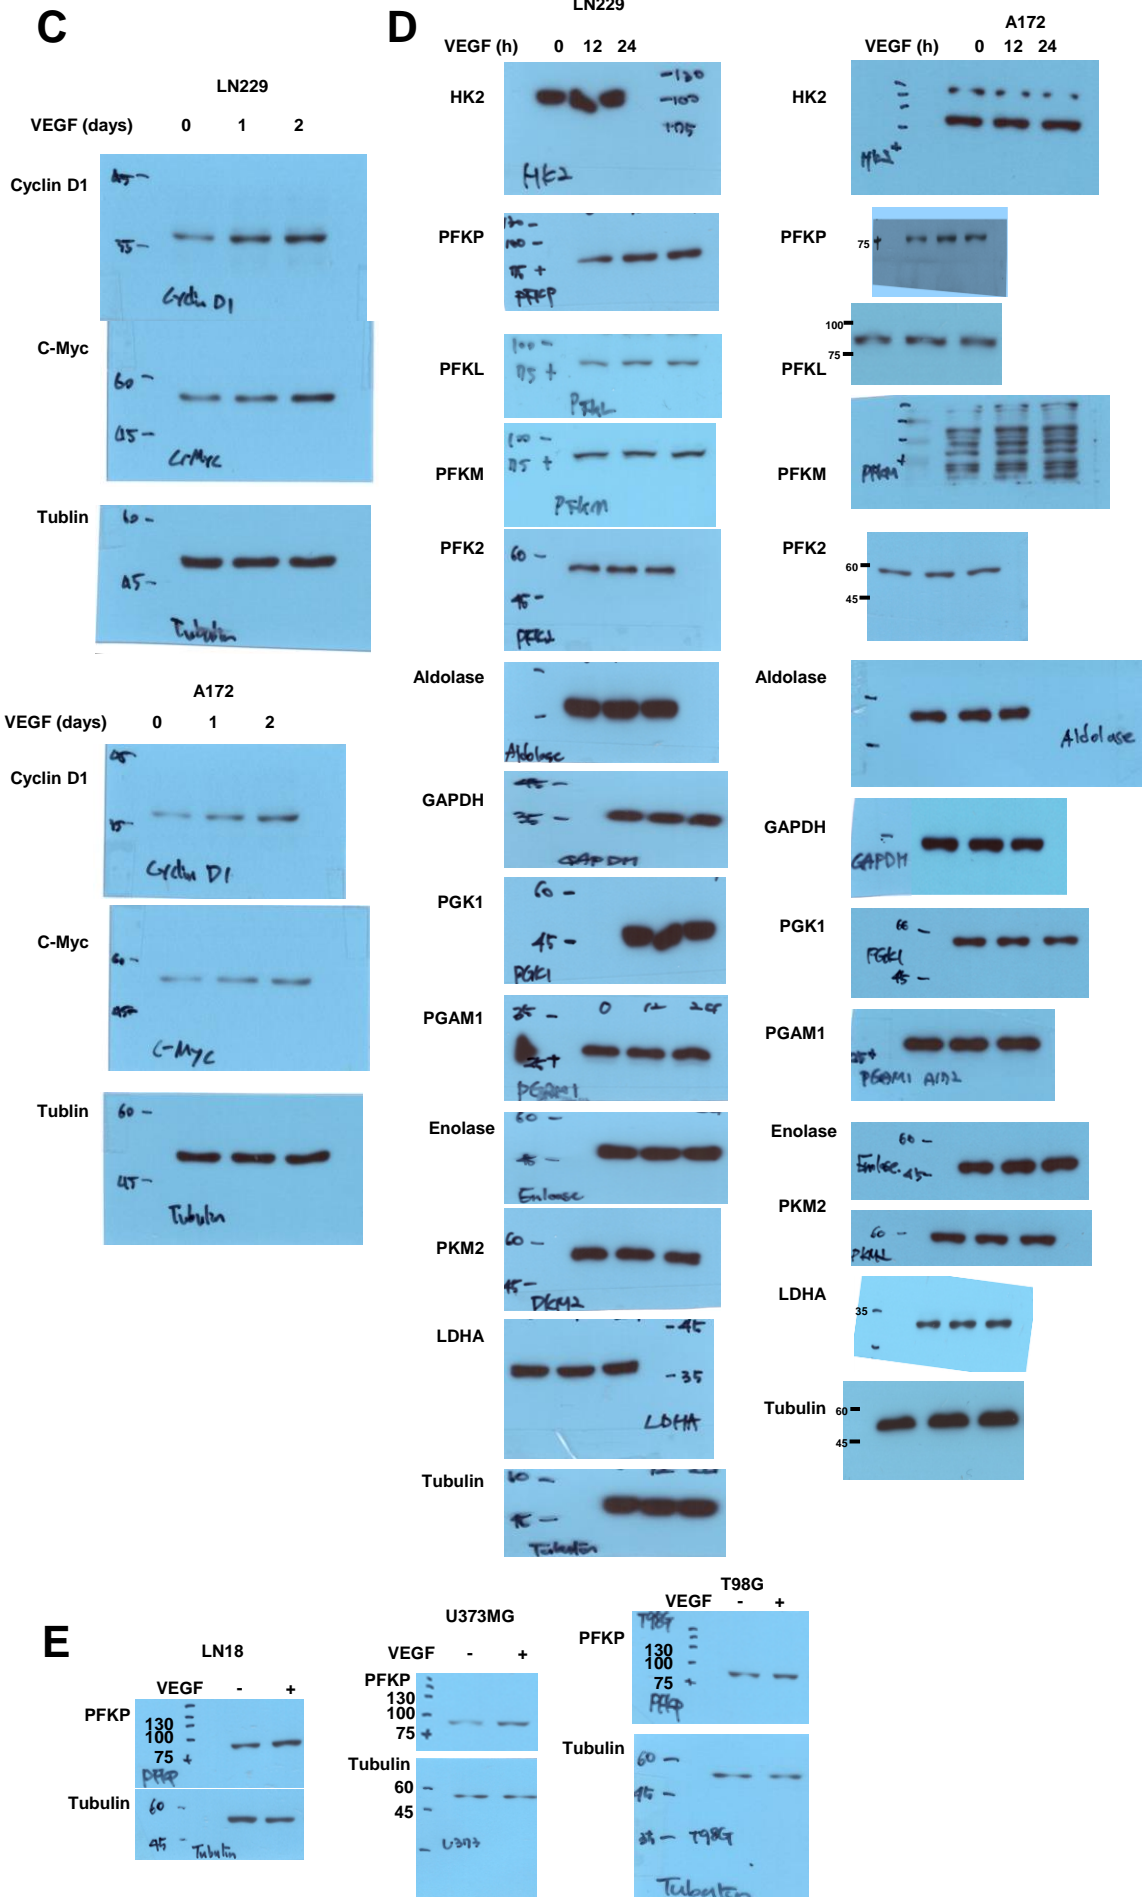

Figure S5

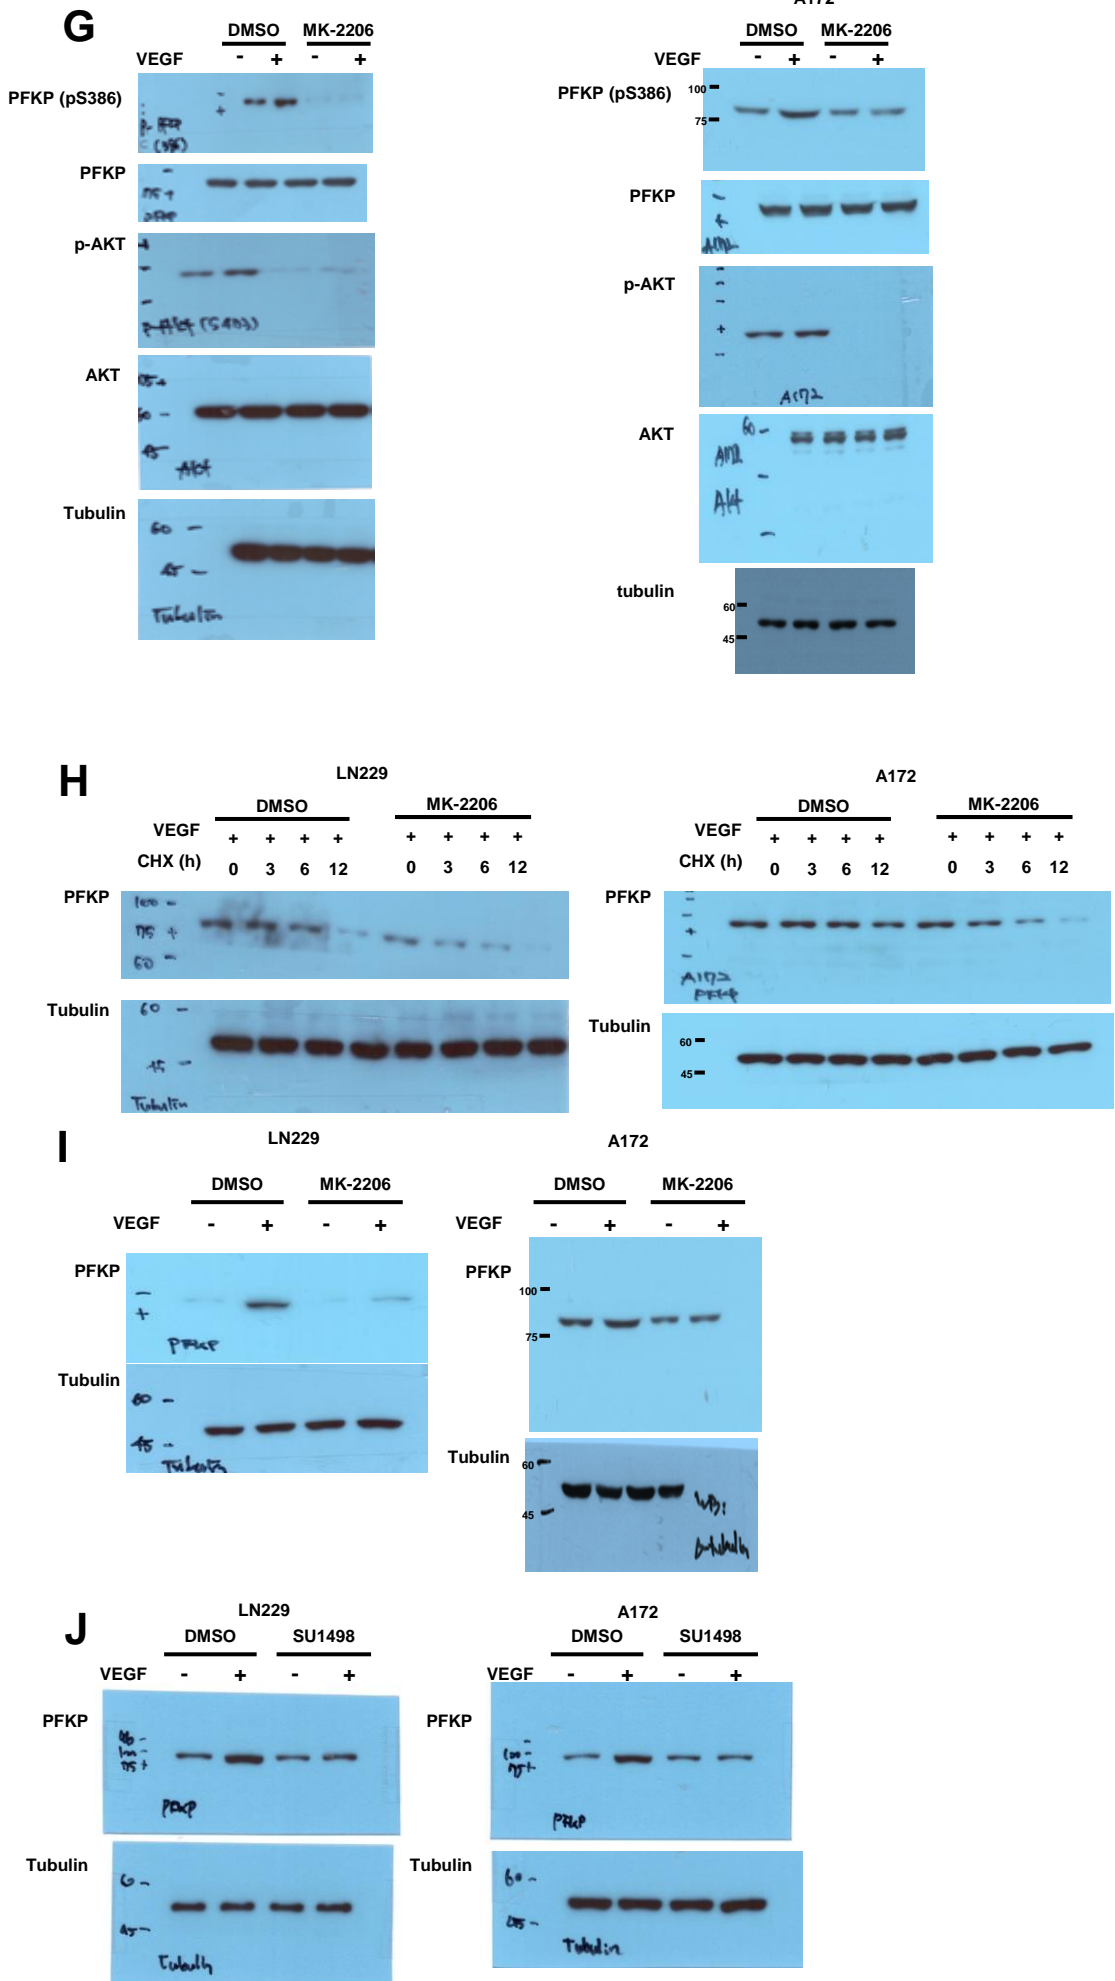

## Supplementary Figure legends

### **Supplementary Fig. 1 (related to Figure 1) PFKP depletion in GBM cells results in impaired EGFR activation-induced VEGF expression.**

WB and qRT-PCR were performed with indicated primers and antibodies, respectively (**A, D-F, H**).

**A** LN229/EGFRvIII cells were transfected with shRNA against PFKP.

**B** Mouse survival times were recorded and visualized using Kaplan-Meier survival curves. Data represent the means  $\pm$  SD of 7 mice.

**C** Representative H&E staining images of intracranial xenografts bearing LN229 cells stably expressing with or without PFKP shRNA (upper panel). IHC analyses of the tumor tissues with an anti-CD31 antibody and quantification of CD31 (bottom panel). Scale bar, 2 mm (upper panel) and 100  $\mu$ m (bottom panel).

**D** Expression levels of VEGF in the LN229 cells stably expressing control shRNA or PFKP shRNA.

**E** Serum-starved U251 cells with or without PFKP depletion were treated with EGF (100 ng/mL) for 12 h.

**F** Serum-starved LN229 and U251 cells with or without PFKP depletion were treated with EGF (100 ng/mL).

**G** LN229/EGFRvIII were stably expressed with control shRNA or PFKP shRNA.

**H** Serum-starved LN229 and U251 cells were pretreated DMSO or actinomycin D (1  $\mu$ g/mL) for



1 h and then stimulated with or without EGF (100 ng/mL).

**I** Serum-starved LN229 and U251 cells stably expressed control shRNA or shPFKP were treated with or without EGF (100 ng/mL) for 12 h.

Data are presented as mean  $\pm$  standard deviation of three independent experiments (**D, E, G, I**).

\*\*\* $P < 0.001$ , based on the Student's t-test.

**Supplementary Fig. 2 (related to Figure 2) PFKP Y64 phosphorylation induces EGFR activation-enhanced *HIF-1 $\alpha$*  transcriptional expression through SP1 transactivation.**

WB and qRT-PCR were performed with the indicated primers and antibodies, respectively (**A-E**).

**A** Serum-starved GSCs were pretreated with the indicated inhibitors for 1 h and then stimulated with or without EGF (100 ng/mL) for 30 min.

**B** Serum-starved LN229 and U251 cells were pretreated with DMSO or MK-2206 (5  $\mu$ M) for 1h and then stimulated with or without EGF (100 ng/mL) for 12 h.

**C** Serum-starved GSCs stably expressing control shRNA or shPFKP were treated with or without EGF (100 ng/mL).

**D** LN229/EGFRvIII cells were transfected with control siRNA or SP1 siRNA.

**E** LN229/EGFRvIII cells were pretreated with PBS or mithramycin (500 nM) for 1 h and then stimulated with or without EGF (100 ng/mL).

Data are presented as mean  $\pm$  standard deviation of three independent experiments (**B, D, E**). \*\* $P < 0.01$ ; \*\*\* $P < 0.001$ , based on the Student's t-test.

**Supplementary Fig. 3 (related to Figure 3) PFKP Y64 phosphorylation induces VEGF expression through HIF-1  $\alpha$  expression and  $\beta$ -catenin Ser552 phosphorylation in response to EGFR activation.**

**A** Serum-starved U251 cells were pre-treated DMSO or HIF-1 $\alpha$  inhibitor (10  $\mu$ M) for 1h and then stimulated with or without EGF (100 ng/mL) for 12 h. WB and qRT-PCR were performed with indicated primers and antibodies, respectively.

**B** Serum-starved LN229 and U251 cells were co-transfected with luciferase reporter plasmids (pGL3-HRE-luciferase) and the Renilla control plasmid. The cells were pretreated with DMSO or HIF-1 $\alpha$  inhibitor (10  $\mu$ M) for 1 h and then stimulated with or without EGF (100 ng/mL) for 12 h. Luciferase activity was measured.

Data are presented as mean  $\pm$  standard deviation of three independent experiments. \*\* $P < 0.01$ ; \*\*\* $P < 0.001$ , based on the Student's t-test.

**Supplementary Fig. 4 (related to Figure 4) PFKP Y64 phosphorylation induces HIF-1  $\alpha$  expression,  $\beta$ -catenin S552 phosphorylation, and VEGF expression, and promotes blood vessel formation *in vivo*.**

Mouse survival times were recorded and visualized using Kaplan-Meier survival curves. Data represent the means  $\pm$  SD of 7 mice.

**Supplementary Fig. 5 (related to Figure 5) VEGF induces PFKP expression, PFKP**

## **expression, PFK enzyme activity, aerobic glycolysis, and proliferation in GBM cells**

WB and qRT-PCR were performed with the indicated primers and antibodies, respectively (**C-E, G-J**).

**A** and **B** Serum-starved LN229 and A172 cells were treated with VEGF (20 ng/mL). Glucose consumption (**A**) and lactate secretion (**B**) were analyzed.

**C** LN229 and A172 cells in 0.1% serum medium were treated with VEGF (20 ng/mL) and then WST-8 assay was performed. WB was performed with indicated antibodies.

**D** and **F** Serum-starved LN229 and A172 cells were treated with VEGF (20 ng/mL). The indicated protein expression levels (**D**) and PFK enzymatic activity (**F**) were measured.

**E** Serum-starved LN18, U373MG, and T98G cells were treated with or without VEGF (20 ng/ml) for 12h.

**G** Serum-starved LN229 and A172 cells were pretreated with DMSO or MK-2206 (5  $\mu$ M) for 1 h and then stimulated with VEGF (20 ng/mL) for 30 min.

**H** Serum-starved LN229 and A172 cells were pretreated with VEGF (20 ng/mL) for 1 h and then treated with cycloheximide (CHX; 100  $\mu$ g/mL) in the presence of DMSO or MK-2206 (5  $\mu$ M). The quantification of PFKP levels relative to tubulin is shown (bottom panel).

**I** Serum-starved LN229 and A172 cells were pretreated with DMSO or MK-2206 (5  $\mu$ M) for 1 h and then stimulated with or without VEGF (20 ng/mL) for 24 h.

**J** Serum-starved LN229 and A172 cells were pretreated with DMSO or SU1498 (30  $\mu$ M) for 1 h and then stimulated with or without VEGF (20 ng/mL) for 24 h.

**K-M** A172 cells with or without the expression of PFKP shRNA and with or without the

reconstituted expression of WT Flag-rPFKP or Flag-rPFKP S386A were cultured in serum-free DMEM with or without VEGF (20 ng/mL) for 24 h. PFK enzymatic activity (**K**), glucose consumption (**L**), and lactate secretion (**M**) were analyzed.

**N** A172 cells with or without the expression of PFKP shRNA and with or without the reconstituted expression of WT Flag-rPFKP or Flag-rPFKP S386A were cultured in 0.1% serum medium with or without VEGF (20 ng/mL) and then WST-8 assay was performed.

Data are presented as mean  $\pm$  standard deviation of three independent experiments (**A-C, F, H, K-N**). \* $P < 0.05$ ; \*\* $P < 0.01$ ; \*\*\* $P < 0.001$ , based on the Student's t-test or one-way ANOVA with Tukey's post hoc test.
